# Supplementary material for: A System Compensation Based Model Predictive AGC Method for Multiarea Interconnected Power Systems with High Penetration of PV System and Random Time Delay between Different Areas
Source: Hindawi journal article supplement (doi:10.1155/2018/9347878), 2018-10-22
Supplement: f1 [file 9347878.f1.pdf]

## Supplementary Materials

$$\mathbf{A}_{11} = \begin{bmatrix} 0 & \frac{1}{M_1} & 0 & 0 & \frac{-1}{M_1} & 0 \\ 0 & \frac{-1}{T_{t1}} & \frac{1}{T_{t1}} & 0 & 0 & 0 \\ 0 & 0 & \frac{-1}{T_{r1}} & \frac{1}{T_{r1}} - \frac{K_{r1}}{T_{g1}} & 0 & 0 \\ 0 & 0 & 0 & \frac{-1}{T_{g1}} & 0 & 0 \\ 0 & 0 & 0 & 0 & 0 & 0 \\ 0 & 0 & 0 & 0 & 0 & -q_1 \end{bmatrix},$$

$$\mathbf{A}_{22} = \begin{bmatrix} 0 & \frac{1}{M_2} & 0 & 0 & \frac{1}{M_2} & 0 \\ 0 & \frac{1}{T_{t2}} & 0 & 0 & 0 & 0 \\ 0 & 0 & \frac{-1}{T_{r2}} & \frac{1}{T_{r2}} - \frac{K_{r2}}{T_{g2}} & 0 & 0 \\ 0 & 0 & 0 & \frac{-1}{T_{g2}} & 0 & 0 \\ 0 & 0 & 0 & 0 & 0 & 0 \\ 0 & 0 & 0 & 0 & 0 & -q_2 \end{bmatrix}$$

$$\mathbf{A}_{\tau 1} = \begin{bmatrix} \frac{-D_1}{M_1} & 0 & 0 & 0 & 0 & 0 \\ 0 & 0 & 0 & 0 & 0 & 0 \\ \frac{-m_1 K_{r1}}{R_1 T_{g1}} & 0 & 0 & 0 & 0 & 0 \\ \frac{-m_1}{R_1 T_{g1}} & 0 & 0 & 0 & 0 & 0 \\ 2\pi T_{12} & 0 & 0 & 0 & 0 & 0 \\ \frac{n_1 - m_1 q_1}{R_1} & 0 & 0 & 0 & 0 & 0 \end{bmatrix},$$

$$\mathbf{A}_{\tau 2} = \begin{bmatrix} \frac{-D_2}{M_2} & 0 & 0 & 0 & 0 & 0 \\ \frac{-1}{T_{t2}} & 0 & 0 & 0 & 0 & 0 \\ \frac{-m_2 K_{r2}}{R_2 T_{g2}} & 0 & 0 & 0 & 0 & 0 \\ \frac{-m_2}{R_2 T_{g2}} & 0 & 0 & 0 & 0 & 0 \\ 2\pi T_{12} & 0 & 0 & 0 & 0 & 0 \\ \frac{n_2 - m_2 q_2}{R_2} & 0 & 0 & 0 & 0 & 0 \end{bmatrix}$$

$$\mathbf{A}_{12} = \begin{bmatrix} 0 & 0 & 0 & 0 & 0 & 0 \\ 0 & 0 & 0 & 0 & 0 & 0 \\ 0 & 0 & 0 & 0 & 0 & 0 \\ 0 & 0 & 0 & 0 & 0 & 0 \\ -2\pi T_{12} & 0 & 0 & 0 & 0 & 0 \\ 0 & 0 & 0 & 0 & 0 & 0 \end{bmatrix},$$

$$\mathbf{A}_{21} = \begin{bmatrix} 0 & 0 & 0 & 0 & 0 & 0 \\ 0 & 0 & 0 & 0 & 0 & 0 \\ 0 & 0 & 0 & 0 & 0 & 0 \\ 0 & 0 & 0 & 0 & 0 & 0 \\ 2\pi T_{12} & 0 & 0 & 0 & 0 & 0 \\ 0 & 0 & 0 & 0 & 0 & 0 \end{bmatrix}$$

$$\mathbf{B}_{11} = \begin{bmatrix} 0 & 0 & \frac{K_{r1}}{T_{g1}} & \frac{1}{T_{g1}} & 0 & n_1 - m_1 q_1 \end{bmatrix}^T,$$

$$\mathbf{B}_{22} = \begin{bmatrix} 0 & 0 & \frac{K_{r2}}{T_{g2}} & \frac{1}{T_{g2}} & 0 & n_2 - m_2 q_2 \end{bmatrix}^T$$

$$\mathbf{B}_{12} = \mathbf{B}_{21} = \mathbf{0}_{6 \times 1},$$

$$\mathbf{F}_{12} = \mathbf{F}_{21} = \mathbf{0}_{6 \times 1}$$

$$\mathbf{F}_{11} = \begin{bmatrix} \frac{-1}{M_1} & 0 & 0 & 0 & 0 & 0 \end{bmatrix}^T,$$

$$\mathbf{F}_{22} = \begin{bmatrix} \frac{-1}{M_2} & 0 & 0 & 0 & 0 & 0 \end{bmatrix}^T$$

$$\mathbf{C}_{11} = \begin{bmatrix} 0 & 0 & 0 & 0 & 1 & 0 \\ 0 & 0 & 0 & 0 & 0 & 0 \\ 0 & 0 & 0 & 0 & 1 & 0 \end{bmatrix},$$

$$\mathbf{C}_{22} = \begin{bmatrix} 0 & 0 & 0 & 0 & -1 & 0 \\ 0 & 0 & 0 & 0 & 0 & 0 \\ 0 & 0 & 0 & 0 & 1 & 0 \end{bmatrix}$$

$$\mathbf{C}_{\tau_1} = \begin{bmatrix} B_1 & 0 & 0 & 0 & 0 & 0 \\ 1 & 0 & 0 & 0 & 0 & 0 \\ 0 & 0 & 0 & 0 & 0 & 0 \end{bmatrix},$$

$$\mathbf{C}_{\tau_2} = \begin{bmatrix} B_2 & 0 & 0 & 0 & 0 & 0 \\ 1 & 0 & 0 & 0 & 0 & 0 \\ 0 & 0 & 0 & 0 & 0 & 0 \end{bmatrix}$$
